# Supplementary material for: The magnitude of non-adherence and contributing factors among adult outpatient with Diabetes Mellitus in Dilla University Referral Hospital, Gedio, Ethiopia
Source: PubMed Central journal article supplement (PMC7932062; doi:10.1371/journal.pone.0247952), 2021-03-04

Fig-1 showing the magnitude of adherence and non-adherence among the participants among T2DM patients who attend the medical referral clinics for treatment and follow up at DURH, 2017

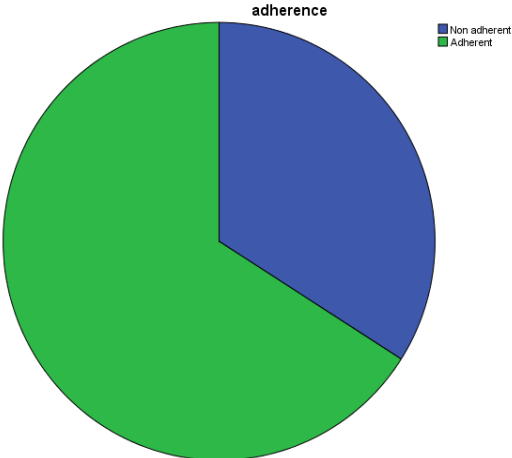

Supplement: pone.0247952.s001.pdf [file pone.0247952.s001.pdf]
